# Supplementary material for: The intrinsic mechanics of B-DNA in solution characterized by NMR
Source: PubMed Central journal article supplement — Nucleic Acids Res. 2016 Feb 15;44(7):3432–47. doi: 10.1093/nar/gkw084 (PMC4838374; doi:10.1093/nar/gkw084), 2016-02-15
Supplement: supp_gkw084_Supplementary_data_12-02-2016.pdf [file supp_gkw084_Supplementary_data_12-02-2016.pdf]

## The intrinsic mechanics of B-DNA in solution characterized by NMR

Akli Ben Imeddourene, Xiaoqian Xu, Loussiné Zargarian, Christophe Oguey, Nicolas Foloppe, Oliver Mauffret, and Brigitte Hartmann

**Figure S1:**  $\Delta\text{RDC}_{\text{C1}'\text{-H1}'}$  as a function of  $\delta\text{P}$

**Table S1:** Correlations between  $\Delta\text{RDCs}$  and  $\delta\text{Ps}$  for each of the four dodecamers

**Table S2:** Correlations between  $D_{\text{inter}}$  and  $\delta\text{Ps}$  for each of the four dodecamers

**Table S3:** NMR data collected on terminal nucleotides

**Table S4:** NMR data collected on terminal dinucleotides

**Figure S1:**  $\Delta\text{RDC}_{\text{C1}'\text{-H1}'}$  as a function of  $\delta\text{P}$

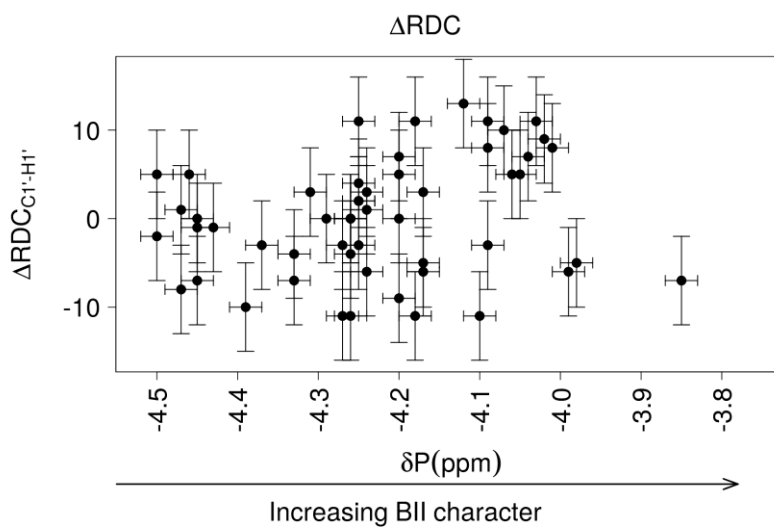

The backbone conformation is represented by  $^{31}\text{P}$  chemical shifts ( $\delta\text{P}$ ).  $\Delta\text{RDC}_{\text{C1}'\text{-H1}'}$  (Hz) are defined as the difference between the  $\text{RDC}_{\text{C1}'\text{-H1}'}$  values of two consecutive vectors, measured on residues  $i$  and  $i+1$ :  $\Delta\text{RDC}_{\text{C1}'\text{-H1}'} = \text{RDC}_{\text{C1}'\text{-H1}'(i+1)} - \text{RDC}_{\text{C1}'\text{-H1}'(i)}$ . The data exclude the terminal steps. The vertical bars are the estimated experimental errors on  $\Delta\text{RDC}$ . The experimental error on  $\delta\text{P}$ s (horizontal bars) is estimated to  $\pm 0.05$  ppm. Clearly,  $\delta\text{P}$  and  $\Delta\text{RDC}_{\text{C1}'\text{-H1}'}$  are not correlated; this is confirmed by the low correlation coefficient of 0.2.

**Table S1** : Correlations between  $\Delta$ RDCs and  $\delta$ Ps for each of the four dodecamers

|         | $\Delta$ RDC <sub>C8-H8</sub> / $\delta$ P |       | $\Delta$ RDC <sub>C3'-H3'4</sub> / $\delta$ P |      | $\Delta$ RDC <sub>C4'-H4'</sub> / $\delta$ P |       |
|---------|--------------------------------------------|-------|-----------------------------------------------|------|----------------------------------------------|-------|
|         | N                                          | CC    | N                                             | CC   | N                                            | CC    |
| Oligo 1 | 16                                         | -0.83 | 12                                            | 0.76 | 7                                            | -0.79 |
| Oligo 2 | 18                                         | -0.52 | 11                                            | 0.62 | 9                                            | -0.84 |
| Oligo 3 | 18                                         | -0.61 | 11                                            | 0.95 | 11                                           | -0.84 |
| Oligo 4 | 8                                          | -0.93 | 3                                             | --   | 2                                            | --    |

This table reports the characteristics of the correlations between  $\Delta$ RDCs and  $\delta$ Ps, obtained from the NMR measurements. These correlations are illustrated in Figure 4. The number of experimental data (N) and correlation coefficient (CC) for each dodecamer are given for each type of  $\Delta$ RDCs.

**Table S2** : Correlations between  $D_{\text{inter}}$  and  $\delta$ Ps for each of the four dodecamers

|         | $D_{\text{inter}}(\text{H6}/\delta_i - \text{H6}/\delta_{i+1})/\delta$ P |      | $D_{\text{inter}}(\text{H2}'_i - \text{H6}/\delta_{i+1})/\delta$ P |      | $D_{\text{inter}}(\text{H2}''_i - \text{H6}/\delta_{i+1})/\delta$ P |      |
|---------|--------------------------------------------------------------------------|------|--------------------------------------------------------------------|------|---------------------------------------------------------------------|------|
|         | N                                                                        | CC   | N                                                                  | CC   | N                                                                   | CC   |
| Oligo 1 | 8                                                                        | 0.76 | 10                                                                 | 0.89 | 11                                                                  | 0.82 |
| Oligo 2 | 7                                                                        | 0.71 | 7                                                                  | 0.83 | 8                                                                   | 0.63 |
| Oligo 3 | 6                                                                        | 0.68 | 9                                                                  | 0.91 | 14                                                                  | 0.77 |
| Oligo 4 | 9                                                                        | 0.73 | 7                                                                  | 0.53 | 9                                                                   | 0.72 |

This table reports the characteristics of the correlations between  $D_{\text{inter}}$  and  $\delta$ Ps, obtained from the NMR measurements. These correlations are illustrated in Figure 4. The number of experimental data (N) and correlation coefficient (CC) for each dodecamers are given for each type of  $D_{\text{inter}}$ .

**Table S3:** NMR data collected on terminal nucleotides

|        |     | $D_{\text{intra}}(\text{H1}'\text{-H6/8})$ | $I(\text{TOCSY}_{\text{H1}'\text{-H4}'})$ | $\text{RDC}_{\text{C6/8-H6/8}}$ |
|--------|-----|--------------------------------------------|-------------------------------------------|---------------------------------|
| Oligo1 | T1  | 4.5                                        | 0                                         | 12                              |
|        | T12 | 3.75                                       | 2.22e+07                                  | Overlap                         |
|        | A13 | 4.3                                        | 6.40e+06                                  | 5                               |
|        | A24 | 4.22                                       | 7.22e+06                                  | Overlap                         |
| Oligo2 | G1  | 4.5                                        | 3.54e+05                                  | 12                              |
|        | G12 | 4.02                                       | 1.39e+06                                  | 7                               |
|        | C13 | Overlap                                    | 6.90e+05                                  | 7                               |
|        | C24 | 4.02                                       | 2.61e+06                                  | 3                               |
| Oligo3 | C1  | 4.3                                        | 8.19e+07                                  | 9                               |
|        | C12 | 3.9                                        | 8.70e+07                                  | 6                               |
|        | G13 | 4.2                                        | 0                                         | 12                              |
|        | G24 | 4.1                                        | 1.47e+08                                  | 8                               |
| Oligo4 | C1  | 3.8                                        | 1.49e+08                                  | 6                               |
|        | G12 | 3.9                                        | 1.68e+08                                  | 7                               |
|        | C13 | 3.8                                        | 1.49e+08                                  | 6                               |
|        | G24 | 3.9                                        | 1.68e+08                                  | 7                               |

The  $D_{\text{intra}}(\text{H1}'\text{-H6/8})$  values (Å) reported here are typical of the anti orientation of the glycosidic bond. The intensity of H1'-H4' TROSY cross-peaks, null and thus not observable for pure *South* sugars, indicates a population of *North* or *East* on most terminal sugars. The  $\text{RDC}_{\text{C6/8-H6/8}}$  values (Hz) are similar to those obtained on internal nucleotides. Some of them are observable but not measurable because of overlaps. The data were collected at 20°C ( $D_{\text{intra}}(\text{H1}'\text{-H6/8})$ ,  $\text{TOCSY}_{\text{H1}'\text{-H4}'}$ ) and 25°C ( $\text{RDC}_{\text{C6/8-H6/8}}$ ).

**Table S4:** Interdinucleotide distances collected on terminal dinucleotides

|         |         | $D_{\text{inter}}$<br>(H2' <sub>i</sub> -H6/8 <sub>i+1</sub> ) | $D_{\text{inter}}$<br>(H2'' <sub>i</sub> -H6/8 <sub>i+1</sub> ) | $D_{\text{inter}}$<br>(H6/8 <sub>i</sub> -H6/8 <sub>i+1</sub> ) | $D_{\text{inter}}$<br>(H5 <sub>i</sub> -H6/8 <sub>i+1</sub> )<br>or<br>(H6/8 <sub>i</sub> -H5 <sub>i+1</sub> ) |
|---------|---------|----------------------------------------------------------------|-----------------------------------------------------------------|-----------------------------------------------------------------|----------------------------------------------------------------------------------------------------------------|
| Oligo 1 | T1pC2   | 4.2                                                            | 2.58                                                            | 5.2                                                             | 5.2                                                                                                            |
|         | C11pT12 | 3.2                                                            | Overlap                                                         | > 6                                                             | > 6                                                                                                            |
|         | A13pG14 | 3.2                                                            | 2.5                                                             | 4.9                                                             | na                                                                                                             |
|         | G23pA24 | 4.2                                                            | Overlap                                                         | > 6                                                             | na                                                                                                             |
| Oligo 2 | G1pC2   | 3.8                                                            | 2.5                                                             | 5.1                                                             | ~5.5                                                                                                           |
|         | C11pG12 | 4.1                                                            | 3.1                                                             | ~5.5                                                            | ~5.5                                                                                                           |
|         | C13pG14 | 3.4                                                            | 3.2                                                             | ~5.5                                                            | > 6                                                                                                            |
|         | G23pC24 | Overlap                                                        | Overlap                                                         | 4.16                                                            | 4.16                                                                                                           |
| Oligo 3 | C1pC2   | 3.5                                                            | 2.14                                                            | 4.8                                                             | 4.6                                                                                                            |
|         | G11pC12 | Overlap                                                        | 2.5                                                             | 5.2                                                             | 4.3                                                                                                            |
|         | G13pC14 | 3.09                                                           | Overlap                                                         | 4.56                                                            | 4.02                                                                                                           |
|         | G23pG24 | Overlap                                                        | Overlap                                                         | > 6                                                             | na                                                                                                             |
| Oligo 4 | C1pG2   | 3.8                                                            | 2.1                                                             | 4.2                                                             | 4.3                                                                                                            |
|         | C11pG12 | 3.52                                                           | 2.8                                                             | ~5.5                                                            | ~5.5                                                                                                           |
|         | C13pG14 | 3.8                                                            | 2.1                                                             | 4.2                                                             | 4.3                                                                                                            |
|         | C23pG24 | 3.52                                                           | 2.8                                                             | ~5.5                                                            | ~5.5                                                                                                           |

$D_{\text{inter}}(\text{H2}'_i\text{-H6}/8_{i+1})$  and  $D_{\text{inter}}(\text{H2}''_i\text{-H6}/8_{i+1})$  (Å) are observable on all the terminal dinucleotides.  $D_{\text{inter}}$  that are only observable in NOESY spectra recorded with a mixing time of 300ms were estimated to ~5.5Å. Some  $D_{\text{inter}}$  are observable but not measurable because of overlaps.  $D_{\text{inter}}$  involving the H5 atom of cytosine are not available (na) in ApG, GpA and GpG steps. The data were collected at 20°C.
